# Supplementary material for: Effect of Rosiglitazone on Circulating Malondialdehyde (Mda) Level in Diabetes Based on a Systematic Review and Meta-Analysis of Eight Clinical Trials
Source: HighWire-hosted journal article supplement (doi:10.1136/jim-2020-001588), 2020-12-23
Supplement: jim-2020-001588supp001_data_supplement.pdf [file jim-2020-001588supp001_data_supplement.pdf]

**Supplementary Table 1.** Quality assessment of included evidences in the systematic review and meta-analysis

| <b>First author</b> | <b>Sequence generation</b> | <b>Allocation concealment</b> | <b>blinding of participants</b> | <b>incomplete outcome data</b> | <b>selective outcome reporting</b> | <b>other source of bias</b> |
|---------------------|----------------------------|-------------------------------|---------------------------------|--------------------------------|------------------------------------|-----------------------------|
| Yilmaz et al. 2005  | Yes                        | Yes                           | Yes                             | No                             | Yes                                | No                          |
| Bibra et al. 2008   | Yes                        | Yes                           | Yes                             | Yes                            | Yes                                | Yes                         |
| Gupta et al. 2010   | Yes                        | Yes                           | No                              | Yes                            | Yes                                | No                          |
| Lazich et al. 2011  | Yes                        | Yes                           | Yes                             | Yes                            | Yes                                | Yes                         |
| Atamer et al. 2013  | Yes                        | Yes                           | No                              | No                             | Yes                                | No                          |
| Huang et al. 2013   | Yes                        | Yes                           | No                              | No                             | Yes                                | Yes                         |
| Li et al. 2019      | Yes                        | Yes                           | No                              | No                             | Yes                                | Yes                         |
| Pasali et al. 2019  | Yes                        | Yes                           | No                              | Yes                            | Yes                                | Yes                         |
