# Supplementary material for: Effect of Rosiglitazone on Circulating Malondialdehyde (Mda) Level in Diabetes Based on a Systematic Review and Meta-Analysis of Eight Clinical Trials
Source: HighWire-hosted journal article supplement (doi:10.1136/jim-2020-001588), 2020-12-23
Supplement: jim-2020-001588supp002_data_supplement.pdf [file jim-2020-001588supp002_data_supplement.pdf]

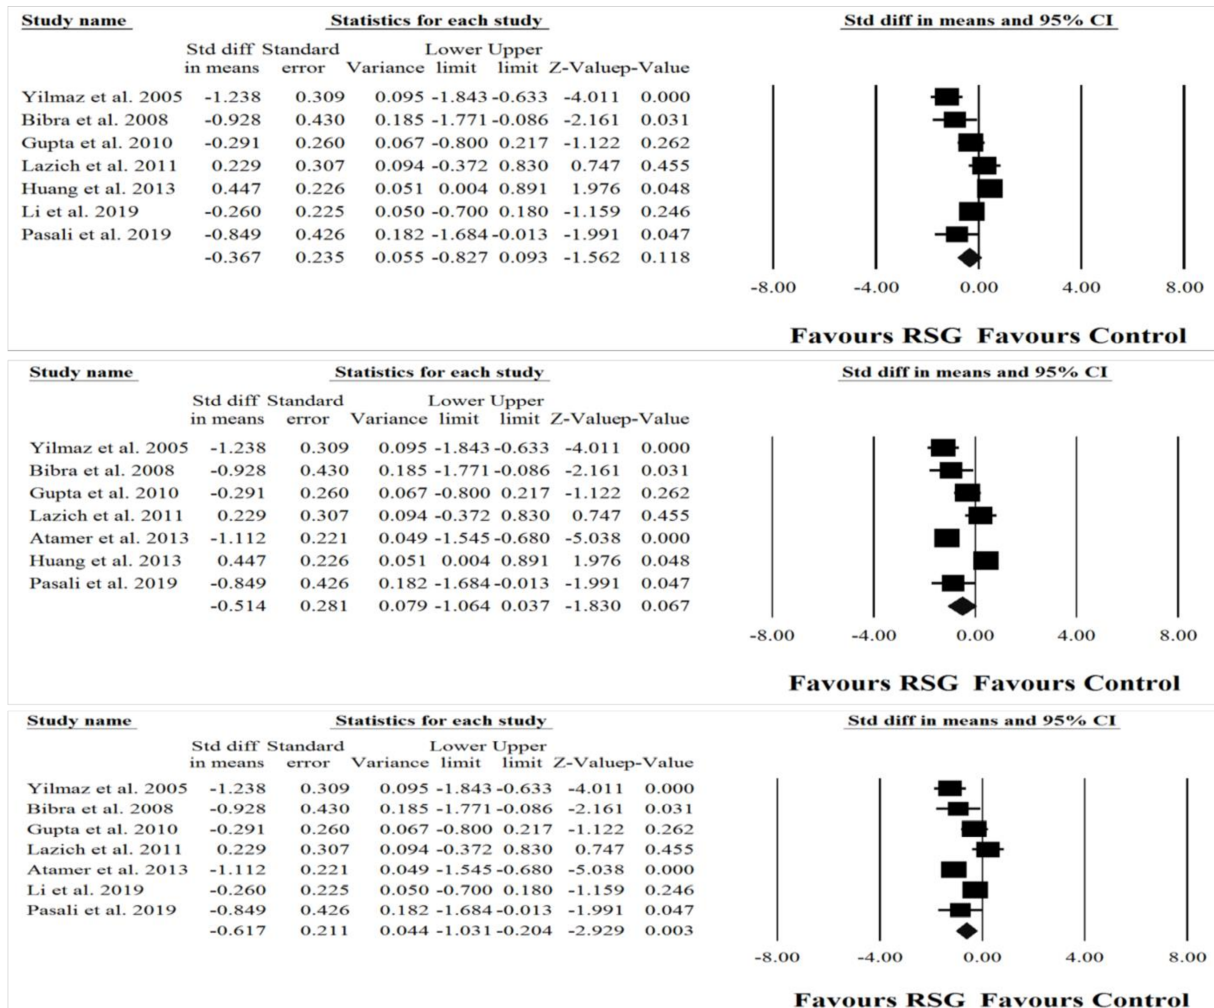

**Supplementary figure 1.** Leave-one-out sensitivity analyses of the effect of rosiglitazone treatment on circulating MDA level with remove the studies with low quality and the study with a large sample size in subjects with T2D. Meta-analysis was performed using a random-effects.
