# Supplementary material for: Effect of Rosiglitazone on Circulating Malondialdehyde (Mda) Level in Diabetes Based on a Systematic Review and Meta-Analysis of Eight Clinical Trials
Source: HighWire-hosted journal article supplement (doi:10.1136/jim-2020-001588), 2020-12-23
Supplement: jim-2020-001588supp003_data_supplement.pdf [file jim-2020-001588supp003_data_supplement.pdf]

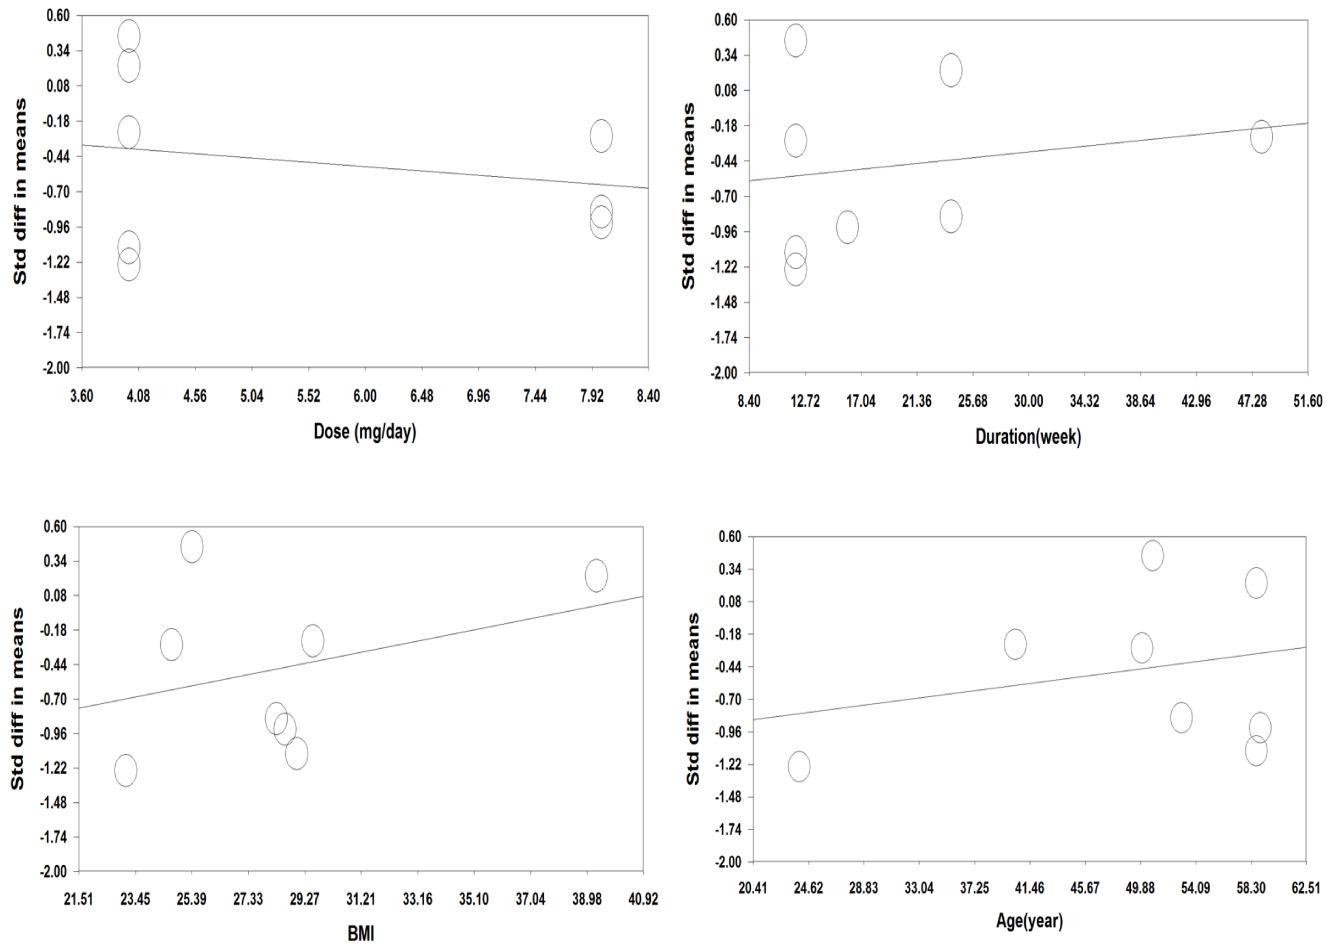

**Supplementary figure 2.** Random-effects Meta-regression plots of the association between net changes in circulating MDA level with a dose of rosiglitazone, duration of intervention, BMI, and age. The size of each circle is inversely proportional to the variance of change.
